# Supplementary material for: Liver X Receptor Ligand GAC0001E5 Downregulates Antioxidant Capacity and ERBB2/HER2 Expression in HER2-Positive Breast Cancer Cells
Source: MDPI journal article supplement (doi:10.3390/cancers16091651), 2024-04-25
Supplement: s1 [file s1]

36B4-F: GTGTTGACAATGGCAGCAT  
36B4-R: GACACCCTCCAGGAAGCGA  
SREBP1c-F: GGAGGGGTAGGGCCAACGGCCT  
SREBP1c-R: CATGTCTTCGAAAGTGCAATCC  
LXR $\beta$ -F: ATCAAGAGGCCGCAGGACCA  
LXR $\beta$ -R: AGGCGAAGACCTGCTCCGAG  
ABCA1-F: TGTGAGGCGGGAAAGACAGAG  
ABCA1-R: AGCCCAAAGCACTCCACCAGGA  
ABCG1-F: CGATGAGCCCACCAGCGGC  
ABCG1-R: ACCCCCTTGAGCGAGCCCTT  
ACACA (ACC) -F: GCAGGTCACACGTCTCTTTAT  
ACACA (ACC) -R: CCAGCCTGTCATCCTCAATATC  
FASN-F: ACAGGGACAACCTGGAGTTCT  
FASN-R: CTGTGGTCCCCTTGATGAGT  
SCD1-F: TTCAGAAACACATGCTGATCCTCATAA  
SCD1-R: ATTAAGCACCACAGCATATCGCAAGAA  
GLS1-F: TTCCAGAAGGCACAGACATG  
GLS1-R: GGCTCAGTACTCTTTCACCAG  
GOT1-F: CAACTGGGATTGACCCAACT  
GOT1-R: GGAACAGAAACCGGTGCTT  
GOT2-F: GTTGCCTCTGCCAATCATATG  
GOT2-R: GAGGGTTGGAATACATGGGAC  
GLUD1-F: AGGAATGACACCAGGGTTTG  
GLUD1-R: TCAGACTACCAACAGCAATAC  
SLC7A11-F: TTTCTGCATCCACATTCCAA  
SLC7A11-R: AACACCATCTGGCATTGTGA  
HER1 (ERBB1)-F: AGGCACGAGTAACAAGCTCAC  
HER1 (ERBB1)-R: ATGAGGACATAACCAGCCACC  
HER2 (ERBB2)-F: TGCAGGGAAACCTGGAAGT  
HER2 (ERBB2)-R: ACAGGGGTGGTATTGTTTCAGC  
HER3 (ERBB3)-F: GGTGATGGGGAACCTTGAGAT  
HER3 (ERBB3)-R: CTGTCACTTCTCGAATCCACTG  
HER4 (ERBB4)-F: GCCTCTGGAGAATTTACGCAT  
HER4 (ERBB4)-R: GGGTTCCGAACAATATCTTGCC

**Supplementary Figure S1.** The list of primers used
